# Supplementary material for: Development of patient-centred standards of care for osteoarthritis in Europe: the eumusc.net-project
Source: PubMed Central journal article supplement — Ann Rheum Dis. 2014 Nov 21;74(6):1145–9. doi: 10.1136/annrheumdis-2014-206176 (PMC4431331; doi:10.1136/annrheumdis-2014-206176), 2014-11-21
Supplement: annrheumdis-2014-206176-s1.pdf [file annrheumdis-2014-206176-s1.pdf]

## Appendix A

| <b>Expert Panel in Alphabetical Order</b> |                              |                |                                                                         |                                                  |
|-------------------------------------------|------------------------------|----------------|-------------------------------------------------------------------------|--------------------------------------------------|
|                                           | <b>Name</b>                  | <b>Country</b> | <b>Organisation</b>                                                     | <b>Profession</b>                                |
| <b>1</b>                                  | <b>Ales Ambrozic</b>         | Slovenia       | University Medical Centre Ljubljana                                     | Rheumatologist                                   |
| <b>2</b>                                  | <b>Florian Berghea</b>       | Romania        | Universitatea de Medicina si Farmacie Carol Davila                      | Rheumatologist                                   |
| <b>3</b>                                  | <b>Annelies Boonen</b>       | Netherlands    | Maastricht University Medical Center                                    | Rheumatologist                                   |
| <b>4</b>                                  | <b>Ailsa Bosworth</b>        | UK             | National Rheumatoid Arthritis Society                                   | Patient Research Partner                         |
| <b>5</b>                                  | <b>Loreto Carmona</b>        | Spain          | Instituto de Salud Musculoestesqueletica                                | Rheumatologist & Epidemiologist                  |
| <b>6</b>                                  | <b>Maxime Dougados</b>       | France         | EULAR & Association de recherche clinique en rhumatologie ARCR          | Rheumatologist                                   |
| <b>7</b>                                  | <b>Maarten de Wit</b>        | Netherlands    | Reumapatiëntenbond                                                      | Patient Research Partner                         |
| <b>8</b>                                  | <b>Josephine Erwin</b>       | UK             | Royal Cornwall Hospital                                                 | Social and Health Scientist                      |
| <b>9</b>                                  | <b>Veronika Fialka-Moser</b> | Austria        | Medizinische Universität Wien                                           | Specialist in Physical Medicine & Rehabilitation |
| <b>10</b>                                 | <b>Ruxandra Ionescu</b>      | Romania        | Universitatea de Medicina si Farmacie Carol Davila                      | Rheumatologist                                   |
| <b>11</b>                                 | <b>Anne-Maree Keenan</b>     | UK             | University of Leeds NIHR Leeds Musculoskeletal Biomedical Research Unit | Podiatrist                                       |
| <b>12</b>                                 | <b>Estibaliz Loza</b>        | Spain          | Instituto de Salud Musculoestesqueletica                                | Rheumatologist                                   |
| <b>13</b>                                 | <b>Rikke H. Moe</b>          | Norway         | National Advisory Unit on Rehabilitation in Rheumatology                | Physiotherapist & Health Scientist               |
| <b>14</b>                                 | <b>Rolf Greiff</b>           | Sweden         | Rheumatikerförbundet, Swedish Rheumatism Association                    | Patient Research Partner                         |
| <b>15</b>                                 | <b>Pawel Olejnik</b>         | Poland         | Instytut Reumatologii                                                   | Physician                                        |
| <b>16</b>                                 | <b>Ingemar F. Petersson</b>  | Sweden         | Lund University                                                         | Rheumatologist                                   |
| <b>17</b>                                 | <b>Anne Christine Rat</b>    | France         | Université de Lorraine, Université Paris Descartes                      | Rheumatologist                                   |

|           |                                      |             |                                                          |                                              |
|-----------|--------------------------------------|-------------|----------------------------------------------------------|----------------------------------------------|
| <b>18</b> | <b>Blaz Rozman</b>                   | Slovenia    | University Medical Centre Ljubljana                      | Rheumatologist                               |
| <b>19</b> | <b>Josef Smolen</b>                  | Austria     | Medizinische Universität Wien                            | Rheumatologist                               |
| <b>20</b> | <b>Tanja A. Stamm</b>                | Austria     | Medizinische Universität Wien                            | Occupational Therapist & Health Scientist    |
| <b>21</b> | <b>Michaela A. Stoffer</b>           | Austria     | Medizinische Universität Wien                            | Occupational Therapist & Health Scientist    |
| <b>22</b> | <b>Britta Strömbeck</b>              | Sweden      | Lund University                                          | Physiotherapist & Health Scientist           |
| <b>23</b> | <b>Lorraine Tanner</b>               | UK          | National Rheumatoid Arthritis Society                    | Patient Research Partner                     |
| <b>24</b> | <b>Till Uhlig</b>                    | Norway      | National Advisory Unit on Rehabilitation in Rheumatology | Rheumatologist                               |
| <b>25</b> | <b>Theodora P. M. Vliet Vlieland</b> | Netherlands | Leiden University Medical Center                         | Physician & Physiotherapist & Epidemiologist |
| <b>26</b> | <b>Anthony Woolf</b>                 | UK          | Royal Cornwall Hospital                                  | Rheumatologist                               |
